# Supplementary material for: The Effect of Sterilization on the Characteristics of Silk Fibroin Nanoparticles
Source: MDPI journal article supplement (doi:10.3390/polym14030498), 2022-01-26
Supplement: s1 [file s1]

# The Effect of Sterilization on the Characteristics of Silk Fibroin Nanoparticles

María Alejandra Asensio Ruiz <sup>1,2</sup>, Marta G. Fuster <sup>3</sup>, Teresa Martínez Martínez <sup>1,2</sup>, Mercedes G. Montalbán <sup>3,\*</sup>, José Luis Cenis <sup>4</sup>, Gloria Vllora <sup>3</sup> and Antonio Abel Lozano-Pérez <sup>2,4,\*</sup>

<sup>1</sup> Unidad de Radiofarmacia, Hospital Clínico Universitario Virgen de la Arrixaca 30120, Murcia, Spain; mariaa.asensio@carm.es (M.A.A.R.); mteresa.martinez5@carm.es (T.M.M.)

<sup>2</sup> Instituto Murciano de Investigación Biosanitaria (IMIB)-Arrixaca, 30120, Murcia, Spain

<sup>3</sup> Chemical Engineering Department, Faculty of Chemistry, Regional Campus of International Excellence “Campus Mare Nostrum”, University of Murcia, 30071 Murcia, Spain; marta.g.f@um.es (M.G.F.); gvllora@um.es (G.V.)

<sup>4</sup> Departamento de Biotecnología, Genómica y Mejora Vegetal, Instituto Murciano de Investigación y Desarrollo Agrario y Medioambiental (IMIDA), 30150 Murcia, Spain; josel.cenis@carm.es (J.L.C.); abel@um.es (A.A.L.-P.)

\* Correspondence: mercedes.garcia@um.es (M.G.M.); abel@um.es (A.A.L.-P.); Tel.: +34-86-888-7926 (M.G.M.); +34-96-836-8586 (A.A.L.-P.)

## S.1. Nanoparticle characterization by ATR-FTIR.

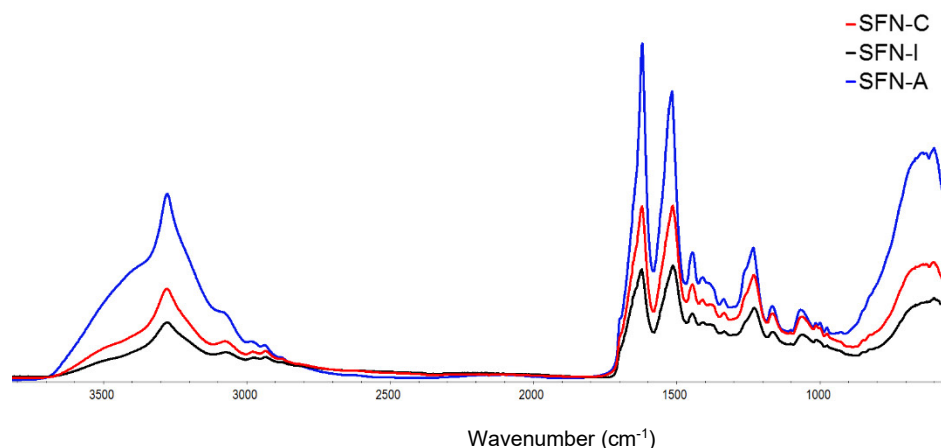

**Figure S1.** ATR-FTIR full spectra of the silk fibroin nanoparticles: non-sterilized (SFN-C, red), autoclaved (SFN-A, blue) and irradiated with 5 kGy (SFN-I, black). Spectra re-scaled for a clearer visualization.

**Table S1.** Silk fibroin secondary structure distribution (%) in the nanoparticles, determined by Fourier self-deconvolution and peak resolution.

| Scheme 1.       | Non-sterilized              | Autoclaved                  | $\gamma$ -Irradiated (5 kGy) |
|-----------------|-----------------------------|-----------------------------|------------------------------|
| $\beta$ -Sheet  | 43.9 $\pm$ 1.2 <sup>a</sup> | 60.8 $\pm$ 2.1 <sup>b</sup> | 44.7 $\pm$ 1.4 <sup>a</sup>  |
| Random coil     | 19.7 $\pm$ 0.4 <sup>a</sup> | 18.6 $\pm$ 1.6 <sup>a</sup> | 21.0 $\pm$ 0.2 <sup>a</sup>  |
| $\alpha$ -Helix | 8.2 $\pm$ 0.2 <sup>a</sup>  | 7.6 $\pm$ 1.0 <sup>a</sup>  | 8.7 $\pm$ 0.1 <sup>a</sup>   |
| Turns           | 11.2 $\pm$ 0.4 <sup>a</sup> | 11.3 $\pm$ 0.6 <sup>a</sup> | 12.9 $\pm$ 1.4 <sup>a</sup>  |
| Side Chains     | 17.0 $\pm$ 0.4 <sup>a</sup> | 1.7 $\pm$ 1.0 <sup>b</sup>  | 12.6 $\pm$ 0.2 <sup>c</sup>  |

<sup>1</sup> Values presented as mean  $\pm$  SD (N=3). <sup>a-d</sup> Different uppercase letters in the same row indicate statistically significant differences between treatments ( $p < 0.05$ ).

## S.2. Stability assays

**Table 2.** Effect of incubation temperature (4 °C or 37 °C) and aqueous media composition (ultrapure water or PBS 1x pH 7.4) on the evolution of the hydrodynamic characteristics of the sterilized silk fibroin nanoparticles. (a) Ultrapure water, 4 °C; (b) Ultrapure water, 37 °C; (c) PBS 1x pH 7.4, 4 °C and (d) PBS 1x pH 7.4, 37 °C. Values presented as Mean  $\pm$  SD (N=9).

| Days of incubation | Medium | Temperature | Sample         | Z-Average (nm) | $\pm$ SD | PdI   | $\pm$ SD | $\zeta$ (mV) | $\pm$ SD |
|--------------------|--------|-------------|----------------|----------------|----------|-------|----------|--------------|----------|
| 0                  | Water  | -           | Non-sterilized | 140.8          | 0.9      | 0.115 | 0.019    | −24.8        | 0.8      |
|                    |        |             | 1 kGy          | 153.6          | 2.6      | 0.117 | 0.014    | −25.0        | 0.7      |
|                    |        |             | 2.5 kGy        | 155.8          | 1.9      | 0.115 | 0.024    | −24.7        | 0.7      |
|                    |        |             | 5 kGy          | 156.4          | 1.1      | 0.103 | 0.028    | −25.8        | 1.0      |
|                    |        |             | 10 kGy         | 158.0          | 1.6      | 0.105 | 0.012    | −25.9        | 0.8      |
|                    |        |             | Autoclave      | 164.3          | 0.9      | 0.129 | 0.012    | −22.0        | 0.8      |
| 7                  | Water  | 4 °C        | Non-sterilized | 145.5          | 0.4      | 0.116 | 0.021    | −24.7        | 0.2      |
|                    |        |             | 1 kGy          | 155.6          | 1.9      | 0.101 | 0.020    | −25.1        | 0.8      |
|                    |        |             | 2.5 kGy        | 155.6          | 2.8      | 0.108 | 0.011    | −26.3        | 0.8      |
|                    |        |             | 5 kGy          | 156.9          | 2.8      | 0.125 | 0.005    | −26.0        | 0.6      |
|                    |        |             | 10 kGy         | 159.9          | 0.8      | 0.109 | 0.017    | −26.5        | 0.9      |
|                    |        |             | Autoclave      | 168.8          | 0.2      | 0.136 | 0.011    | −22.2        | 0.4      |
|                    |        | 37 °C       | Non-sterilized | 144.4          | 0.8      | 0.114 | 0.016    | −25.4        | 0.8      |
|                    |        |             | 1 kGy          | 156.2          | 0.8      | 0.111 | 0.012    | −25.5        | 1.0      |
|                    |        |             | 2.5 kGy        | 159.2          | 1.5      | 0.103 | 0.015    | −25.3        | 0.7      |
|                    |        |             | 5 kGy          | 157.8          | 1.5      | 0.122 | 0.005    | −26.3        | 0.2      |
|                    |        |             | 10 kGy         | 158.9          | 0.5      | 0.120 | 0.018    | −27.3        | 1.1      |
|                    |        |             | Autoclave      | 171.0          | 1.1      | 0.130 | 0.011    | −23.1        | 1.2      |
|                    | PBS    | 4 °C        | Non-sterilized | 138.0          | 1.1      | 0.131 | 0.014    | −24.2        | 1.5      |
|                    |        |             | 1 kGy          | 145.6          | 0.6      | 0.138 | 0.025    | −23.3        | 1.2      |
|                    |        |             | 2.5 kGy        | 147.3          | 3.9      | 0.131 | 0.005    | −22.9        | 1.4      |
|                    |        |             | 5 kGy          | 138.9          | 3.9      | 0.107 | 0.017    | −26.2        | 1.1      |
|                    |        |             | 10 kGy         | 143.3          | 1.2      | 0.108 | 0.021    | −25.4        | 0.4      |
|                    |        |             | Autoclave      | 164.1          | 1.1      | 0.142 | 0.023    | −21.5        | 1.5      |
|                    |        | 37 °C       | Non-sterilized | 135.9          | 3.4      | 0.115 | 0.031    | −22.4        | 0.9      |
|                    |        |             | 1 kGy          | 136.6          | 1.7      | 0.108 | 0.014    | −25.9        | 2.1      |
|                    |        |             | 2.5 kGy        | 135.9          | 0.9      | 0.136 | 0.018    | −26.9        | 1.9      |
|                    |        |             | 5 kGy          | 135.8          | 0.9      | 0.123 | 0.012    | −27.6        | 2.2      |
|                    |        |             | 10 kGy         | 137.8          | 2.0      | 0.119 | 0.017    | −25.0        | 0.9      |
|                    |        |             | Autoclave      | 151.7          | 2.6      | 0.133 | 0.041    | −23.7        | 1.9      |
| 15                 | Water  | 4 °C        | Non-sterilized | 146.1          | 0.5      | 0.105 | 0.025    | −23.7        | 0.3      |
|                    |        |             | 1 kGy          | 144.3          | 1.6      | 0.114 | 0.020    | −22.8        | 0.5      |
|                    |        |             | 2.5 kGy        | 142.4          | 1.6      | 0.121 | 0.01     | −24.0        | 0.4      |
|                    |        |             | 5 kGy          | 142.7          | 1.6      | 0.118 | 0.016    | −24.4        | 1.3      |
|                    |        |             | 10 kGy         | 137.8          | 0.7      | 0.133 | 0.017    | −26.0        | 1.8      |
|                    |        |             | Autoclave      | 149.6          | 0.6      | 0.144 | 0.019    | −21.8        | 0.9      |
|                    |        | 37 °C       | Non-sterilized | 139.5          | 2.2      | 0.127 | 0.013    | −21.7        | 0.8      |
|                    |        |             | 1 kGy          | 137            | 3.0      | 0.138 | 0.015    | −21.3        | 1.5      |
|                    |        |             | 2.5 kGy        | 143.7          | 1.4      | 0.114 | 0.013    | −22.5        | 0.9      |
|                    |        |             | 5 kGy          | 134.8          | 1.4      | 0.112 | 0.011    | −22.2        | 0.4      |
|                    |        |             | 10 kGy         | 140.8          | 0.8      | 0.13  | 0.03     | −23.8        | 1.0      |
|                    |        |             | Autoclave      | 152.1          | 1.7      | 0.137 | 0.017    | −19.8        | 0.8      |
|                    | PBS    | 4 °C        | Non-sterilized | 143.9          | 1.1      | 0.117 | 0.011    | −26.0        | 0.2      |
|                    |        |             | 1 kGy          | 143.2          | 1.0      | 0.132 | 0.011    | −25.6        | 0.7      |
|                    |        |             | 2.5 kGy        | 144.4          | 2.6      | 0.131 | 0.011    | −25.9        | 0.4      |
|                    |        |             | 5 kGy          | 145.8          | 2.6      | 0.131 | 0.014    | −25.9        | 0.9      |
|                    |        |             | 10 kGy         | 139.2          | 1.1      | 0.131 | 0.005    | −26.9        | 0.3      |
|                    |        |             | Autoclave      | 152.4          | 2.9      | 0.156 | 0.007    | −23.4        | 0.5      |
|                    |        | 37 °C       | Non-sterilized | 147.8          | 0.7      | 0.133 | 0.029    | −21.0        | 1.3      |

|    |       |       |                |       |     |       |       |       |     |
|----|-------|-------|----------------|-------|-----|-------|-------|-------|-----|
|    |       |       | 1 kGy          | 145.1 | 1.9 | 0.138 | 0.024 | −25.2 | 1.8 |
|    |       |       | 2.5 kGy        | 150.1 | 2.8 | 0.167 | 0.03  | −24.3 | 1.3 |
|    |       |       | 5 kGy          | 144.3 | 2.8 | 0.135 | 0.001 | −23.8 | 1.5 |
|    |       |       | 10 kGy         | 142.1 | 2.3 | 0.155 | 0.003 | −23.4 | 0.8 |
|    |       |       | Autoclave      | 153.3 | 4.2 | 0.156 | 0.013 | −21.0 | 1.1 |
| 30 | Water | 4 °C  | Non-sterilized | 145   | 1.5 | 0.124 | 0.016 | −24.6 | 1.4 |
|    |       |       | 1 kGy          | 142.1 | 1.0 | 0.104 | 0.007 | −24.1 | 1.1 |
|    |       |       | 2.5 kGy        | 143.3 | 1.6 | 0.107 | 0.015 | −25.5 | 0.9 |
|    |       |       | 5 kGy          | 144.7 | 1.6 | 0.118 | 0.013 | −26.0 | 0.4 |
|    |       |       | 10 kGy         | 146.6 | 0.7 | 0.12  | 0.023 | −26.0 | 0.6 |
|    |       |       | Autoclave      | 152   | 1.9 | 0.129 | 0.004 | −22.7 | 1.0 |
|    |       | 37 °C | Non-sterilized | 142.3 | 3.7 | 0.136 | 0.006 | −23.8 | 0.3 |
|    |       |       | 1 kGy          | 142.9 | 0.8 | 0.132 | 0.011 | −26.4 | 0.8 |
|    |       |       | 2.5 kGy        | 144.1 | 1.2 | 0.128 | 0.01  | −25.5 | 0.4 |
|    |       |       | 5 kGy          | 145.4 | 1.2 | 0.118 | 0.013 | −26.2 | 0.8 |
|    |       |       | 10 kGy         | 146.4 | 0.5 | 0.107 | 0.013 | −27.2 | 0.4 |
|    |       |       | Autoclave      | 151.5 | 1.5 | 0.15  | 0.016 | −22.0 | 0.8 |
|    | PBS   | 4 °C  | Non-sterilized | 158.4 | 1.7 | 0.149 | 0.018 | −21.4 | 1.3 |
|    |       |       | 1 kGy          | 142.9 | 1.3 | 0.124 | 0.024 | −24.6 | 1.1 |
|    |       |       | 2.5 kGy        | 142.2 | 1.6 | 0.115 | 0.029 | −23.9 | 1.1 |
|    |       |       | 5 kGy          | 144.2 | 1.6 | 0.134 | 0.005 | −23.9 | 1.5 |
|    |       |       | 10 kGy         | 141.7 | 1.4 | 0.104 | 0.003 | −24.9 | 1.2 |
|    |       |       | Autoclave      | 175.7 | 2.5 | 0.164 | 0.016 | −20.6 | 1.3 |
|    |       | 37 °C | Non-sterilized | 155.3 | 1.8 | 0.132 | 0.008 | −21.9 | 0.6 |
|    |       |       | 1 kGy          | 146   | 0.9 | 0.11  | 0.029 | −24.4 | 0.9 |
|    |       |       | 2.5 kGy        | 138.9 | 1.9 | 0.114 | 0.02  | −25.6 | 1.4 |
|    |       |       | 5 kGy          | 142.9 | 1.9 | 0.119 | 0.015 | −25.1 | 2.1 |
|    |       |       | 10 kGy         | 143.2 | 1.0 | 0.111 | 0.026 | −25.4 | 2.0 |
|    |       |       | Autoclave      | 168.1 | 4.0 | 0.138 | 0.016 | −21.9 | 1.1 |

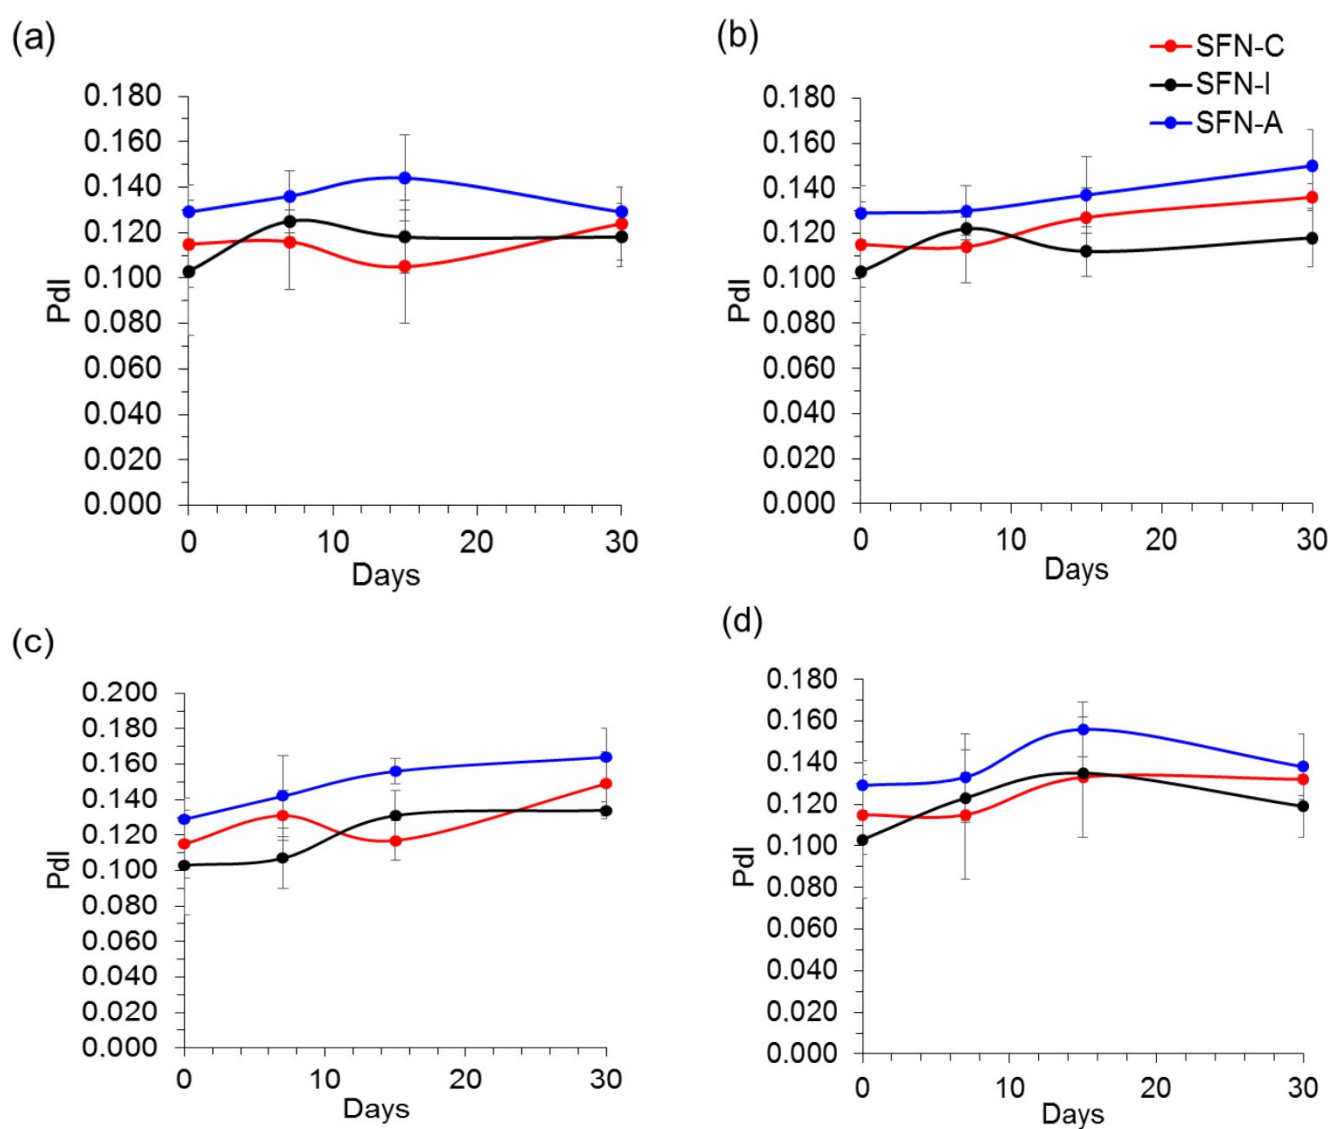

**Figure S2.** Effect of incubation temperature and aqueous media composition on the evolution of the Polydispersity Index (PdI) of the non-sterilized nanoparticles (SFN-C, red), autoclaved (SFN-A, blue) and  $\gamma$ -irradiated with 5 kGy (SFN-I, black) for 30 days in: (a) Ultrapure water, 4 °C; (b) Ultrapure water, 37 °C; (c) PBS 1x pH 7.4, 4 °C and (d) PBS 1x pH 7.4, 37 °C. Values presented as PdI  $\pm$  SD (N=9).

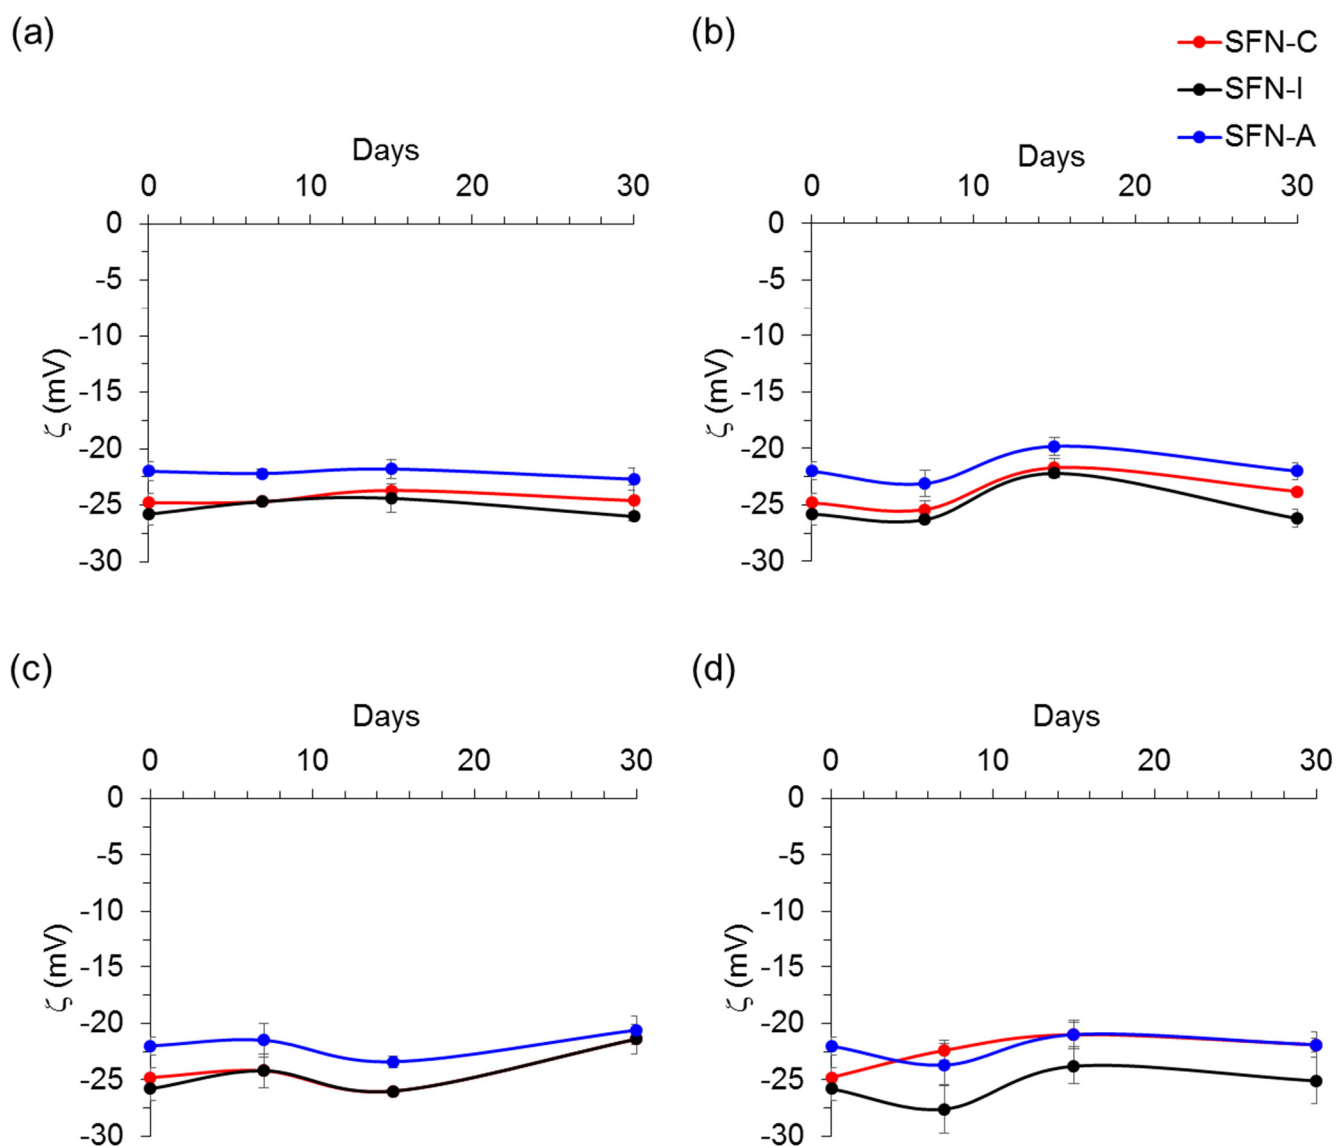

**Figure S3.** Effect of incubation temperature and aqueous media composition on the evolution of the  $\zeta$  (mV) of the non-sterilized nanoparticles (SFN-C, red), autoclaved (SFN-A, blue) and  $\gamma$ -irradiated with 5 kGy (SFN-I, black) for 30 days in: (a) Ultrapure water, 4 °C; (b) Ultrapure water, 37 °C; (c) PBS 1x pH 7.4, 4 °C and (d) PBS 1x pH 7.4, 37 °C. Values presented as  $\zeta$  (mV)  $\pm$  SD (N=9).
